# Supplementary material for: Extremely low-energy collective modes in a quasi-one-dimensional topological system
Source: Springer Nature journal article supplement (doi:10.1007/s11433-022-1855-5), 2022-03-31
Supplement: 11433_2022_1855_MOESM1_ESM.pdf [file 11433_2022_1855_MOESM1_ESM.pdf]

**Supplemental Material: Extremely low-energy collective modes in a  
quasi-one-dimensional topological system**

Z. X. Wei et al.

## A. Experimental setup and sample preparation

The time-resolved transient reflectivity signals,  $\Delta R(t)/R$ , were measured based on a degenerate pump-probe scheme using a Ti:sapphire laser oscillator that produces  $\sim 55$  fs (FWHM) pulses at the sample position with a repetition rate of 80 MHz. The center wavelength can be tuned between 780 nm and 820 nm. The pump beam directs along the normal. The probe beam is incident at a  $\sim 10$  degree angle to the sample normal. Typically, the pump was kept  $p$ -polarized, while the polarization of the probe beam was kept  $s$ -polarized (perpendicular to the  $c$ -axis or parallel to the  $a$ -axis of the sample). The cross-polarization configuration is used to remove the initial coherent artifacts [1]. The ZrTe<sub>5</sub> single crystals with three different thicknesses of  $\sim 0.1$ , 0.3 and 0.5 mm were studied in this work, and similar results were obtained. These crystals were prepared by the Te-assisted chemical vapor transport method [2] or molten Te flux growth [3]. All the measurements were taken in vacuum ( $\sim 10^{-6}$  Torr).

## B. Fit of relaxation processes characterized by $\tau_1$ and $\tau_s$

### 1. Necessity including the process characterized by $\tau_1$

Necessity including the  $\tau_1$  process can be understood more easily by showing the  $\Delta R$  data in short timescale. Fig. S1 evidently demonstrates that it is essential to include such  $\tau_1$  process in order to fit well the initial slow rising. Mathematically, failure of fitting the experimental  $\Delta R$  data without  $\tau_1$  process arises from the initial rising time limited by convolution via the Gaussian function  $G(t)$ , i.e.  $\sim 100$  fs, which is far less than what we detected ( $\sim 0.5$  ps).

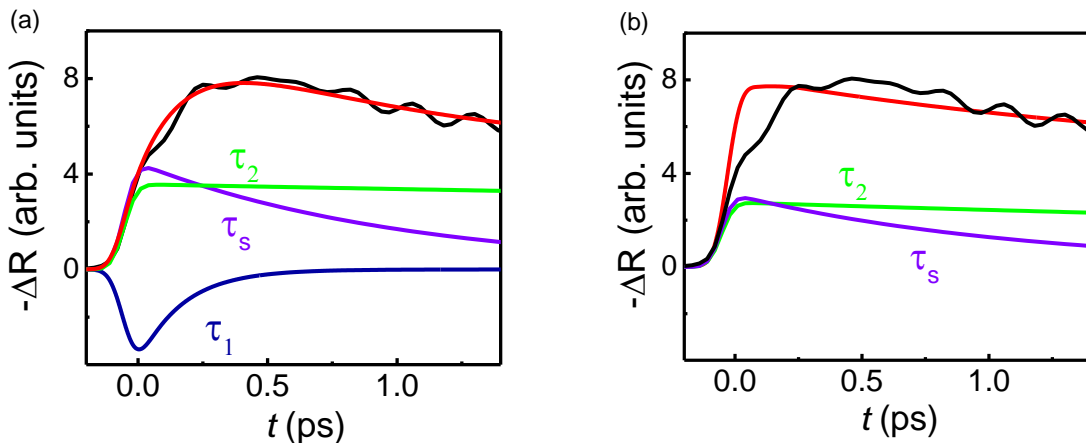

FIG. S1. The transient reflectivity  $\Delta R(t)$  in short timescale measured at 5 K (black lines). We here employ the equation  $\Delta R = [A_1 e^{-t/\tau_1} + A_2 e^{-t/\tau_2} + A_s e^{-t/\tau_s}] \otimes G(t)$  to fit the experimental data.  $A_1 > 0$ ,  $A_2 < 0$  and  $A_s < 0$ . The red lines are fitted curves (a) with and (b) without the  $\tau_1$  process that has amplitude with opposite sign.

### 2. Fit of relaxation time $\tau_1$ and $\tau_s$ via the two-temperature mode (TTM)

Within TTM, the electron-phonon relaxation time  $\tau_{e-ph}$  is given by [4, 5]:

$$\tau_{e-ph} = \frac{\gamma(T_e^2 - T_l^2)}{2H(T_e, T_l)}, \quad (1)$$

where  $\gamma$  is the electronic specific heat coefficient. Here,

$$H(T_e, T_l) = f(T_e) - f(T_l), \quad (2)$$

$$f(T) = 4g_{ep} \frac{T^5}{\theta_D^4} \int_0^{\theta_D/T} \frac{x^4}{e^x - 1} dx, \quad (3)$$

where  $T_e$  is the electron temperature after electron-electron (e-e) thermalization, which is initially higher than the lattice temperature  $T_l$ .  $g_{ep}$  is electron-phonon coupling coefficient. The  $T_e$  can be estimated by:

$$T_e = \sqrt{T_l^2 + \frac{2U_l}{\gamma}}, \quad (4)$$

where  $U_l$  is energy density of laser light. The fits to  $\tau_1$  and  $\tau_s$  as a functions of temperature are given in the Figs. 2(a) and (e) of the main text, respectively. For  $\tau_1$ ,  $\gamma = 0.65 \text{ J}\cdot\text{m}^{-3}\text{K}^{-2}$  and  $g_{ep} = 5.4 \times 10^{15} \text{ W}\cdot\text{m}^{-3}\text{K}^{-1}$ . For  $\tau_s$ ,  $\gamma = 7.3 \text{ J}\cdot\text{m}^{-3}\text{K}^{-2}$  and  $g_{ep} = 1.9 \times 10^{15} \text{ W}\cdot\text{m}^{-3}\text{K}^{-1}$ .  $\tau_1$  and  $\tau_s$  as functions of fluence are also given in the S2 (a) and (b), which can be well fitted using the TTM. Under the condition of  $T_e - T_l \ll T_l$  (or low pump fluence regime),  $\tau_{e-ph}$  can be approximated as:  $\tau_{e-ph} \approx \frac{\pi k_B T_e}{3\hbar\lambda\langle\omega^2\rangle}$  [4, 5]. Since  $T_e$  increases with the pump fluence increasing,  $\tau_{e-ph}$  also becomes larger as the pump fluence increases.

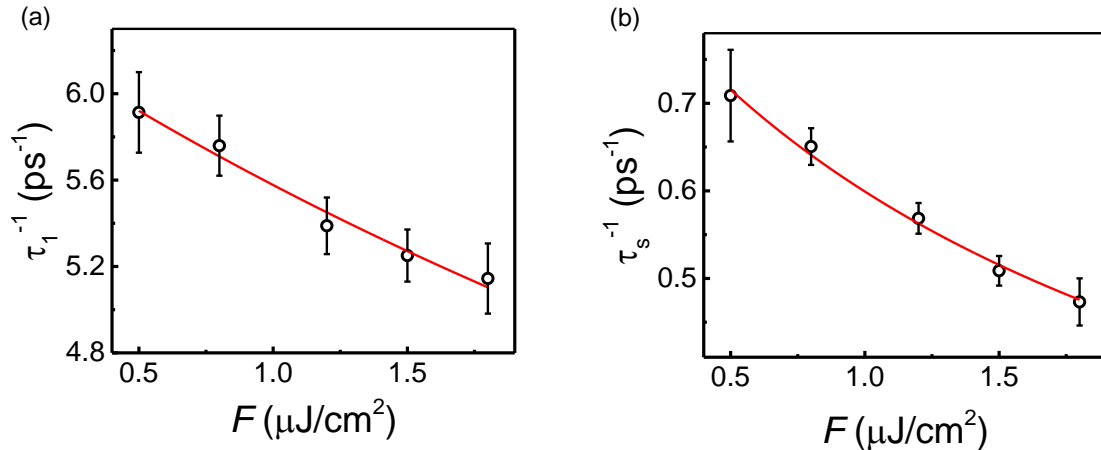

FIG. S2. (a) and (b) are  $\tau_1$  and  $\tau_s$  as a function of fluence ( $F$ ). The red solid lines are fit using the TTM.

### C. Theoretical fit based on the phonon-assisted recombination process

The strongly temperature-dependent  $\tau_2(T)$  can be quantitatively described by [6],

$$\frac{1}{\tau_2} = A \frac{\frac{\hbar\omega}{2k_B T}}{\sinh^2\left(\frac{\hbar\omega}{k_B T}\right)} + \frac{1}{\tau_0}, \quad (5)$$

where  $\omega$  corresponds to frequency of the phonon mode assisting e-h recombination.  $\tau_0$  represents a temperature independent recombination time which varies with sample quality.  $A$  is a parameter related to the density of states in the electronic energy bands and the matrix elements for interband e-h scattering. The fitted results agree quite well with the experimental  $\tau_2$  (see Fig. 2(c) in the main text), and strongly justify the presence of phonon-assisted e-h recombination.

### D. Raman spectroscopy data and coherent oscillations via transient reflectivity measurements

We have carried out a detailed temperature-dependent Raman spectroscopy experiment on  $\text{ZrTe}_5$ . As shown in Fig. S3(a), the peaks indexed by 1, 4, 5, 6, and 7 stand for the  $A_g$  phonon modes, and another two indexed by 2 and 3 arise from the  $B_{2g}$  phonon modes [7, 8]. Based on Fig. 3 of the main text and Fig. S3, in addition to  $\omega_1$  and  $\omega_2$  modes, we clearly detected the Raman-active phonons indexed by 1, 5, and 6 via the oscillatory  $\Delta R(t)/R$  signals. The close-neighboring modes indexed by 4 and 5, especially the former, have very low intensity and decay extremely fast, which lead to a relative broad feature in the Fourier transform spectra. The mode indexed by 7 is out of our detection limit. Since generation of the coherent optical phonons is associated with the Raman scattering process [9, 10], the amplitude of detected phonon is very sensitive to the pump or probe polarization of the laser beam relative to the crystal orientation (see Fig. S3(b) and (c)). Our experiment configuration only allows to initiate the  $A_g$  and  $B_{2g}$

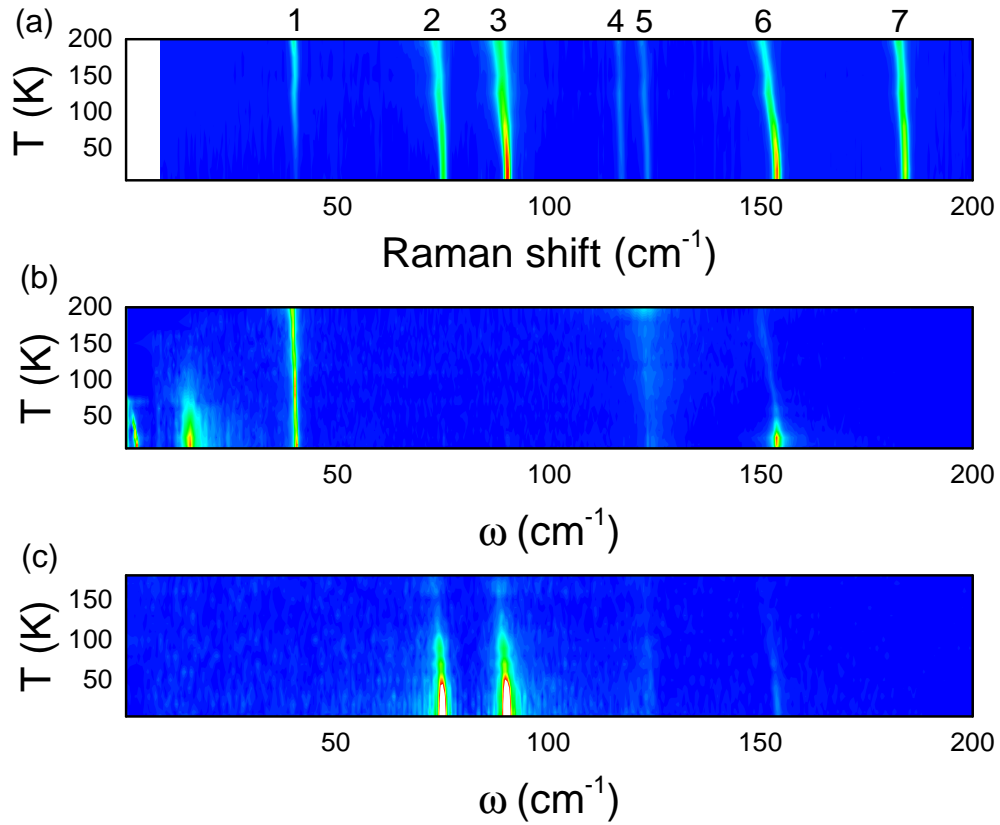

FIG. S3. (a) The temperature dependent Raman spectra of  $\text{ZrTe}_5$ . (b) and (c) The temperature-dependent Fourier transform spectra for the extracted oscillations. Signals in (c) were obtained via the anisotropic reflectivity measurements.

Raman modes in  $\text{ZrTe}_5$  [7, 8]. In fact, based on the Raman tensor of  $B_{2g}$  mode, its dependence on the polarization has a  $\sin 2\theta$ -like behavior and can be selectively extracted via the anisotropic reflectivity measurements [10], as seen in Fig. S3(c). The  $A_g$  modes are isotropic in contrast to the  $B_{2g}$  phonon modes. Some typical temperature-dependent transient reflectivity data at different wavelengths in the long-time domain are shown in Fig. S4, where various oscillation signals can be seen.

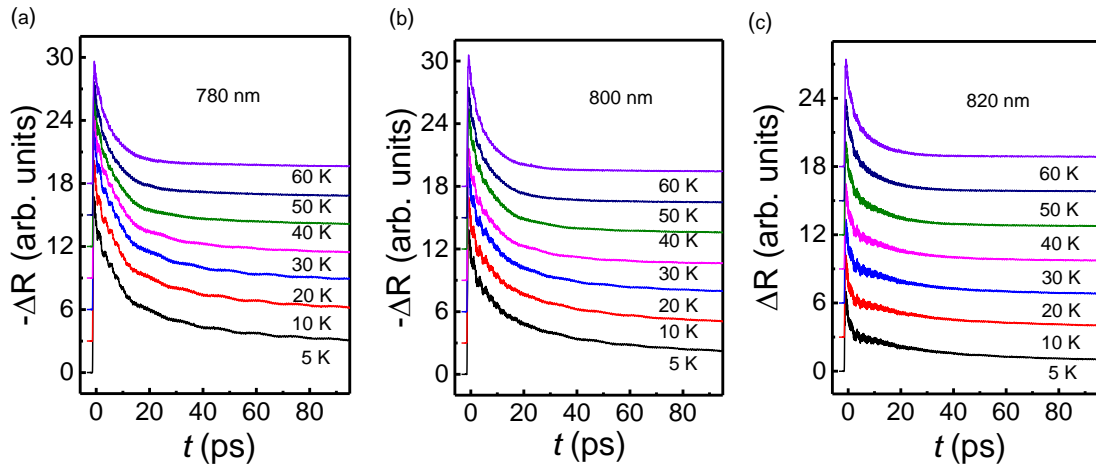

FIG. S4. The typical temperature-dependent transient reflectivity data measurements for different wavelengths in the long-time domain.

We note that the laser pulse chirping could affect the amplitudes of coherent optical phonons [11, 12]. However,

since the fs pulses arriving at the samples are nearly transform limited via our pulse compression system, this effect can be safely neglected. Moreover, even if there exists slight chirp effect, its influence on characterizing the sample quality can also be ignored due to the characteristic phonon frequencies remaining unchanged. Nonetheless, all these experimental data demonstrate that the ZrTe<sub>5</sub> samples we used have very high quality, which is a prerequisite for the further experiments. Note that we took the phonon mode with highest energy in the Raman data as the Debye frequency, which was used to extract the electron-phonon coupling constant  $\lambda$  [4].

### E. Phonon renormalization as a function of temperature

Renormalization of the  $T$ -dependent optical phonons can be characterized by their frequencies ( $\omega$ ) and decay rates ( $\Gamma$ ) in the temperature domain. Here, we mainly focus on discussing quantitatively  $\omega(T)$  if not mentioned in the text. The typical  $\omega$  results from the ultrafast experiments are shown in Fig. S5. Here, except the mode with frequency of  $\sim 3.7$  THz, in order to obtain  $\omega$ , a sine damped equation  $Ae^{-t/\tau}\sin(2\pi\omega t + \phi)$  was used to fit each oscillatory component extracted via different frequency filter in  $\Delta R/R$  [13]. For the 3.7 THz mode (indexed by 5 in Fig. S3(a)), we directly extracted the  $T$ -dependent data by picking up the peak values in the Fourier transform spectra. The mode indexed by 8 with frequency larger than  $200\text{ cm}^{-1}$  is not shown in Fig. S3 but is also listed here. All the detected Raman peaks ( $\omega$ ) as a function of temperature are given in Fig. S5. Clearly, results from both experiments agree very well, and demonstrate that there is no anomaly observed near  $T^*$ , which indicates no structural phase transition happening near  $T^*$ . Frequencies of the optical phonon modes in general present a softening behavior as the temperature increases. Such  $T$ -dependent behavior can be quantitatively explained by the anharmonic phonon model (solid line in Fig. S5)[14–16],

$$\omega(T) = \omega_0 + A_1[1 + 2n(\omega_0/2)] \quad (6)$$

where  $\omega = 2\pi f$ ,  $n(\omega) = [e^{\hbar\omega/k_B T} - 1]^{-1}$ ,  $\omega_0$  is the bare harmonic frequency. It can be seen that the fitted data are in excellent agreement with the experimental results.

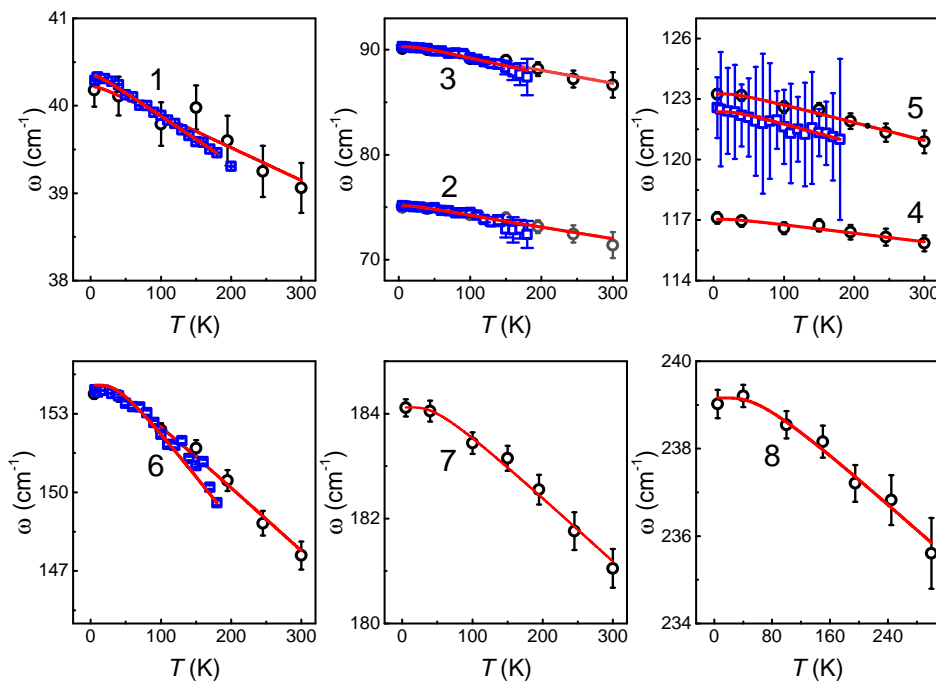

FIG. S5. Temperature dependence of the oscillation frequencies for optical phonon modes (blue open squares) extracted from the ultrafast experiments. For comparison, temperature dependence of Raman peaks (black open dots) in the frequency domain are also given. The red solid curves are fits to the data using Eq.6. The mode indexes follow those in Fig. S3(a).

Some detail temperature- and wavelength-dependent fitted parameters for two typical optical phonon modes are shown in Table I. It can be seen that their phases are nearly independent the temperature and wavelength. No  $\pi$ -phase change was observed in the experiment.

TABLE I. Some typical fitted parameters such as frequency, phase, and decay rate of the two main coherent optical phonon modes  $\sim 1.2$  THz and  $\sim 4.6$  THz as functions of wavelength and temperature.

| wavelength (nm) | T (K)                    | Frequency (THz)          | phase                    | decay rate ( $\text{ps}^{-1}$ ) | Frequency (THz)          | phase                 | decay rate ( $\text{ps}^{-1}$ ) |
|-----------------|--------------------------|--------------------------|--------------------------|---------------------------------|--------------------------|-----------------------|---------------------------------|
| 780             | 5                        | 1.20667 $\pm$ 7.00114E-5 | 2.11933 $\pm$ 0.00841    | 0.00877 $\pm$ 3.31789E-4        | 4.63112 $\pm$ 8.0385E-4  | 2.61005 $\pm$ 0.02622 | 0.02727 $\pm$ 0.00385           |
|                 | 10                       | 1.20712 $\pm$ 6.40336E-5 | 1.98387 $\pm$ 0.00767    | 0.00913 $\pm$ 3.03862E-4        | 4.62928 $\pm$ 7.61999E-4 | 2.61048 $\pm$ 0.02494 | 0.02398 $\pm$ 0.00364           |
|                 | 20                       | 1.20686 $\pm$ 7.41145E-5 | 1.86184 $\pm$ 0.00881    | 0.01012 $\pm$ 3.53571E-4        | 4.62581 $\pm$ 6.54729E-4 | 2.60061 $\pm$ 0.0215  | 0.02024 $\pm$ 0.00312           |
|                 | 30                       | 1.20592 $\pm$ 1.03262E-4 | 1.88142 $\pm$ 0.00808    | 0.01245 $\pm$ 3.36259E-4        | 4.62767 $\pm$ 0.00101    | 2.62536 $\pm$ 0.03286 | 0.0321 $\pm$ 0.00488            |
|                 | 40                       | 1.20555 $\pm$ 6.99085E-5 | 1.79181 $\pm$ 0.00808    | 0.01314 $\pm$ 3.39915E-4        | 4.62767 $\pm$ 0.00101    | 2.62536 $\pm$ 0.03286 | 0.0321 $\pm$ 0.00488            |
|                 | 50                       | 1.20392 $\pm$ 7.08476E-5 | 1.86106 $\pm$ 0.00807    | 0.01466 $\pm$ 3.47803E-4        | 4.61547 $\pm$ 8.17102E-4 | 2.61801 $\pm$ 0.02649 | 0.03293 $\pm$ 0.00394           |
| 800             | 60                       | 1.20297 $\pm$ 7.15908E-5 | 1.78258 $\pm$ 0.00797    | 0.01687 $\pm$ 3.56736E-4        | 4.60839 $\pm$ 8.84727E-4 | 2.61967 $\pm$ 0.02869 | 0.0323 $\pm$ 0.00427            |
|                 | 5                        | 1.20835 $\pm$ 5.05472E-5 | 1.81 $\pm$ 0.0081        | 0.0067 $\pm$ 1.60839E-4         | 4.62458 $\pm$ 5.07587E-4 | 2.691 $\pm$ 0.01606   | 0.06672 $\pm$ 0.00244           |
|                 | 10                       | 1.20772 $\pm$ 4.10202E-5 | 1.84199 $\pm$ 0.00649    | 0.0075 $\pm$ 1.33648E-4         | 4.6223 $\pm$ 3.62583E-4  | 2.99584 $\pm$ 0.01041 | 0.09758 $\pm$ 0.00189           |
|                 | 20                       | 1.20827 $\pm$ 5.68965E-5 | 1.90525 $\pm$ 0.00862    | 0.00958 $\pm$ 1.97633E-4        | 4.62697 $\pm$ 7.78972E-4 | 2.74425 $\pm$ 0.02307 | 0.08692 $\pm$ 0.00395           |
|                 | 30                       | 1.20845 $\pm$ 9.11741E-5 | 2.17563 $\pm$ 0.01271    | 0.01276 $\pm$ 3.49924E-4        | 4.60439 $\pm$ 7.545E-4   | 2.50554 $\pm$ 0.02149 | 0.10053 $\pm$ 0.00396           |
|                 | 40                       | 1.20576 $\pm$ 5.57588E-5 | 2.12886 $\pm$ 0.00733    | 0.01489 $\pm$ 2.2812E-4         | 4.61401 $\pm$ 3.56615E-4 | 2.67556 $\pm$ 0.01029 | 0.09588 $\pm$ 0.00185           |
|                 | 50                       | 1.20698 $\pm$ 1.33617E-4 | 2.08186 $\pm$ 0.0173     | 0.01542 $\pm$ 5.54352E-4        | 4.61662 $\pm$ 7.11324E-4 | 2.71663 $\pm$ 0.01956 | 0.11276 $\pm$ 0.00383           |
|                 | 60                       | 1.20471 $\pm$ 7.51236E-5 | 1.97628 $\pm$ 0.00907    | 0.01804 $\pm$ 3.33219E-4        | 4.63944 $\pm$ 0.00443    | 2.74557 $\pm$ 0.12128 | 0.11322 $\pm$ 0.02376           |
| 820             | 100                      | 1.20245 $\pm$ 2.48388E-4 | 1.946 $\pm$ 0.02293      | 0.03211 $\pm$ 0.00139           | 4.54677 $\pm$ 0.01236    | 2.17987 $\pm$ 0.09247 | 0.2917 $\pm$ 0.07861            |
|                 | 200                      | 1.18774 $\pm$ 3.44249E-4 | 1.794 $\pm$ 0.02868      | 0.04088 $\pm$ 0.00199           | 4.46503 $\pm$ 0.002375   | 2.63163 $\pm$ 0.21952 | 1.05017 $\pm$ 0.2636            |
|                 | 5                        | 1.21008 $\pm$ 9.32163E-5 | 1.89947 $\pm$ 0.01159    | 0.00318 $\pm$ 4.33295E-4        | 4.62218 $\pm$ 3.53213E-4 | 2.60055 $\pm$ 0.01125 | 0.064833 $\pm$ 0.00169          |
|                 | 10                       | 1.21032 $\pm$ 1.0428E-4  | 1.7643 $\pm$ 0.01269     | 0.00681 $\pm$ 4.89699E-4        | 4.61691 $\pm$ 1.45505E-4 | 2.54113 $\pm$ 0.00462 | 0.06604 $\pm$ 6.96964E-4        |
|                 | 20                       | 1.20859 $\pm$ 6.76924E-5 | 2.00708 $\pm$ 0.00818    | 0.00794 $\pm$ 3.19627E-4        | 4.61433 $\pm$ 1.8211E-4  | 2.53018 $\pm$ 0.00572 | 0.06889 $\pm$ 8.80744E-4        |
|                 | 30                       | 1.20881 $\pm$ 1.34098E-4 | 1.87505 $\pm$ 0.01594    | 0.01 $\pm$ 6.39376E-4           | 4.6169 $\pm$ 2.53156E-4  | 2.59892 $\pm$ 0.00761 | 0.08234 $\pm$ 0.00127           |
|                 | 40                       | 1.20677 $\pm$ 7.68158E-5 | 2.20929 $\pm$ 0.00899    | 0.01189 $\pm$ 3.70235E-4        | 4.61475 $\pm$ 3.63396E-4 | 2.6447 $\pm$ 0.01071  | 0.08884 $\pm$ 0.00185           |
|                 | 50                       | 1.20585 $\pm$ 8.73628E-5 | 2.07755 $\pm$ 0.01017    | 0.01243 $\pm$ 4.22808E-4        | 4.60542 $\pm$ 0.00102    | 2.65125 $\pm$ 0.02532 | 0.15286 $\pm$ 0.00583           |
| 60              | 1.20534 $\pm$ 1.31413E-4 | 2.07668 $\pm$ 0.01495    | 0.01467 $\pm$ 6.45146E-4 | 4.59752 $\pm$ 0.00119           | 2.703784 $\pm$ 0.02768   | 0.17911 $\pm$ 0.00696 |                                 |

### F. More discussions about the coherent acoustic phonon

In fact, if the low frequency mode characterized by  $\omega_1$  or  $\omega_2$  is due to the coherent acoustic phonon, we can quantitatively estimate the frequency value of the corresponding oscillation for a given probe wavelength using the formula:  $T = 1/f = \lambda_p(2nV_s \cos\theta)^{-1}$  (Refs. [56–58] in the main text). Here,  $T$  and  $f$  are the oscillation period and frequency, respectively.  $n$  is the refractive index.  $V_s$  is the sound velocity.  $\lambda_p$  is the angle of incidence of the probe light inside the sample with respect to the normal of sample surface. Using parameters  $n \sim 2$  [17],  $V_s \sim 10^3$  m/s (Ref. [62] in the main text), and  $\theta \sim 0$  and  $\lambda_p \sim 800$  nm, we can estimate the oscillation period is about 200 ps, whose corresponding frequency ( $f = 1/T$ ) is clearly much lower than  $\omega_1/2\pi$  and  $\omega_2/2\pi$ . Such result itself already can exclude the coherent acoustic phonon.

The change of period is related to the change of wavelength by the derived formula:  $\Delta T = \Delta\lambda_p(2nV_s \cos\theta)^{-1}$ . In our experiment,  $\Delta\lambda_p$  can have a change of  $\sim 40$  nm, and then the corresponding  $\Delta T$  is  $\sim 10$  ps, which is a huge variation in the oscillation signals. Accordingly, if  $\omega_1$  or  $\omega_2$  modes arise from the acoustic phonons, the frequency shift ( $\Delta f$ ) could change by a factor of  $\sim 1/2$  for the  $\omega_1$  mode, and nearly by more than one order of magnitude for the  $\omega_2$  mode. In our experiment, we covered a time range of  $\sim 0.5$  ns with a time resolution of  $\sim 10$  fs, it is quite enough for detecting the changes estimated above. Therefore, based on above analysis we can safely rule out the coherent acoustic phonons.

### G. $\pi$ -phase difference between 820 nm and 800/780 nm for the $\omega_1$ mode

We note there exists a  $\pi$  phase difference for the  $\omega_1$  mode using light with wavelengths between 820 nm and 780/800 nm. In fact, under the CDW phase, the state of investigated system can be described by an order parameter  $\Psi = \Delta e^{i\phi}$ , where the amplitude  $\Delta$  and phase  $\phi$  are functions of space and time. During discussion of the optical response, the dielectric constant within such phase transition can be expanded in powers of the order parameter [18]:  $\epsilon \simeq \epsilon_0 + \alpha|\Psi|^2 = \epsilon_0 + \alpha\Delta^2$ , where  $\alpha$  is a constant solely determined by the intrinsic material properties. Therefore, fluctuation of the amplitude,  $\delta\Delta$ , can be given by:  $\delta\epsilon \simeq 2\alpha\Delta_0\delta\Delta$ , where  $\Delta_0$  is an equilibrium value,  $\epsilon$  and  $\alpha$  are complex numbers given by  $\epsilon = \epsilon_r + i\epsilon_i$  and  $\alpha = \alpha_r + i\alpha_i$ , respectively.

On the other hand, in our experiment  $\delta\Delta$  is directly manifested by the corresponding oscillatory transient reflectivity change  $[\delta R]_{osc}$ , i.e.  $\delta\Delta \propto [\delta R]_{osc}$ . Because  $[\delta R]_{osc}$  can be related to  $\epsilon$  by  $[\delta R]_{osc} = \frac{\partial[R]_{osc}}{\partial\epsilon_r}\delta\epsilon_r + \frac{\partial[R]_{osc}}{\partial\epsilon_i}\delta\epsilon_i$  (Supplemental Material of Ref. [19]), we can obtain

$$[\delta R]_{osc} \propto \frac{\alpha_r}{2|\alpha|^2\Delta_0}\delta\epsilon_r + \frac{\alpha_i}{2|\alpha|^2\Delta_0}\delta\epsilon_i. \quad (7)$$

When we discuss the wavelength ( $\lambda$ ) dependent behavior, since  $\epsilon$  is a function of  $\lambda$ , we can rewrite the above equation as

$$[\delta R]_{osc} \propto \frac{1}{2|\alpha|^2\Delta_0} \left( \alpha_r \frac{\partial\epsilon_r}{\partial\lambda} + \alpha_i \frac{\partial\epsilon_i}{\partial\lambda} \right) \delta\lambda. \quad (8)$$

Based on such relation, if the coefficient,  $\alpha_r\partial\epsilon_r/\partial\lambda + \alpha_i\partial\epsilon_i/\partial\lambda$ , experiences a sudden sign reversal, then  $\delta\Delta$  and its associated oscillatory signal  $[\delta R]_{osc}$  should have an immediate  $\pi$  phase change.

Here, two points are needed to be clarified. (1) When we check the wavelength-dependent dielectric constants of ZrTe<sub>5</sub> [17], values of  $\partial\epsilon_r/\partial\lambda$  (or  $\partial\epsilon_i/\partial\lambda$ ) along  $a$ - and  $c$ -axis follow similar  $\lambda$ -dependence, and can undergo abrupt changes including the sign reversal around some anomalies near 820 nm ( $\sim 1.5$  eV). (2) Our experiments were carried out at low temperatures. Since with decreasing temperature the band gaps usually experience a blue shift ( $dE_g/dT < 0$ ) causing a similar effect in absorption features of  $\epsilon(\lambda)$ , the related anomalies in  $\epsilon_r(\lambda)$  and  $\epsilon_i(\lambda)$  will experience a blue shift as well. Therefore, it is possible for these anomalies to reside between 780 nm ( $\sim 1.59$  eV) and 820 nm ( $\sim 1.51$  eV) at low temperatures.

Consequently, the coefficient,  $\alpha_r\partial\epsilon_r/\partial\lambda + \alpha_i\partial\epsilon_i/\partial\lambda$ , can undergo a sudden sign reversal and induce a  $\pi$ -phase difference in  $\delta\Delta$  as the  $\lambda$  varies within the spectral regime of our experiment. Specifically, if the quasi-one dimensional  $\omega_1$  CDW mode (along  $b$ -axis) is a transverse mode with its amplitude determined by  $(\partial\epsilon/\partial\lambda)_{a,c}$ , its  $\pi$ -phase difference between 820 nm and 800/780 nm can then be reasonably explained in this way. We note that the magnitude of corresponding oscillation is also very sensitive to the above coefficient, as evidently revealed in Fig. 3(d) of the main text.

When discussing the phase change of high dimensional  $\omega_2$  CDW mode, we need to include contribution from the additional  $(\partial\epsilon/\partial\lambda)_b$  term, which behaves quite differently from  $(\partial\epsilon/\partial\lambda)_{a,c}$  in terms of their absolute values but also the signs, i.e.  $(\partial\epsilon_r/\partial\lambda)_b > 0$  and  $(\partial\epsilon_i/\partial\lambda)_b > 0$  for  $\lambda$  between  $\sim 600$  nm and  $\sim 820$  nm (or  $h\nu$  between  $\sim 1.5$  eV and  $\sim 2$  eV). Therefore, if introducing the  $\epsilon_b$ -related terms leads to the sign of above coefficient unchanged, the  $\pi$ -phase difference will not be observed as  $\lambda$  varies within the current spectral regime, as is confirmed by our experiments.

### H. Oscillation signals including $\omega_1$ and $\omega_2$ modes as a function of pump fluence ( $F$ )

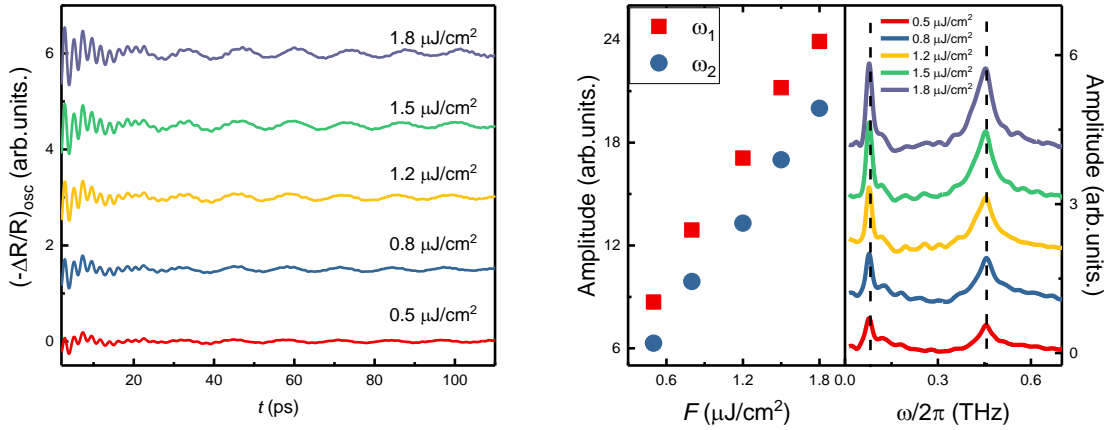

FIG. S6. (a)  $F$ -dependent oscillation signals  $(\Delta R/R)_{osc}$  signals at 5 K for  $\omega_1$  and  $\omega_2$  modes. (b)  $F$ -dependent amplitudes and Fourier spectra from (a). Dashed lines indicate the peak positions of these two modes.

Fig. S6(a) shows the typical oscillation signals  $(\Delta R/R)_{osc}$  as a function of  $F$  at 5 K extracted using a low pass frequency filter with a cutoff frequency of 1 THz. Overall, the signal strength increases with  $F$ . Our data fall within the linear regime, manifested clearly by the amplitude of the  $\omega_1$  and  $\omega_2$  modes linearly dependent on  $F$ , as shown in Fig. S6 (b). We also did not observe any frequency shift as the fluence changes.

### I. Extraction of $T$ -dependent fitting parameters for the $\omega_1$ and $\omega_2$ modes

$\Gamma_j$  and  $\omega_j/2\pi$  were obtained by fitting the experimental data using formula:  $A_{\omega_j}e^{-\Gamma_j t}\sin(\omega_j t + \phi_j)$  ( $j = 1, 2$ ). The oscillation data of  $\omega_2$  mode were first extracted using a 0.2-0.9 THz frequency filter to the original oscillatory signals. Typical fitting examples are shown in Fig. S7. The fitted amplitude  $A_{\omega_1}$  and  $A_{\omega_2}$  are also shown in Figs. S8(a) and (b). As shown in Fig. S8(c), in the decay process characterized by  $\tau_s$ , no clear anomaly was observed near  $T_C^{\omega_1}$  ( $\simeq 54$  K) in the temperature-dependent amplitude,  $A_s(T)$ , which, together with  $\tau_s(T)$ , further confirm that  $\omega_1$  mode can be ignored in discussing the potential bosons involved in the scattering process.

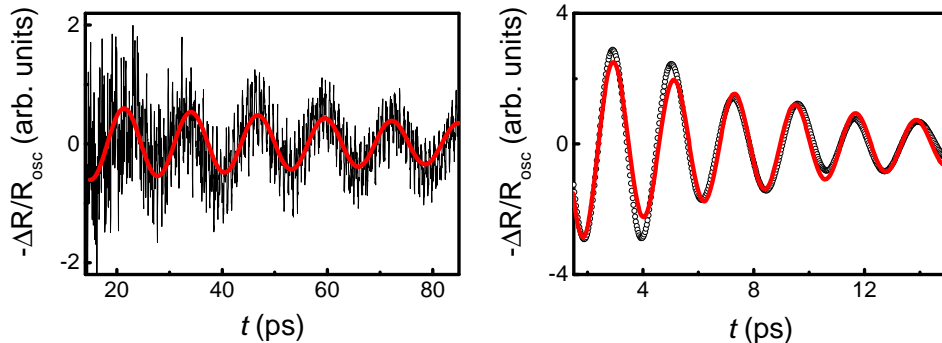

FIG. S7. (a) and (b) are typical oscillatory signals for  $\omega_1$  and  $\omega_2$  modes at 5 K, respectively. The red solid lines are examples for the fitting.

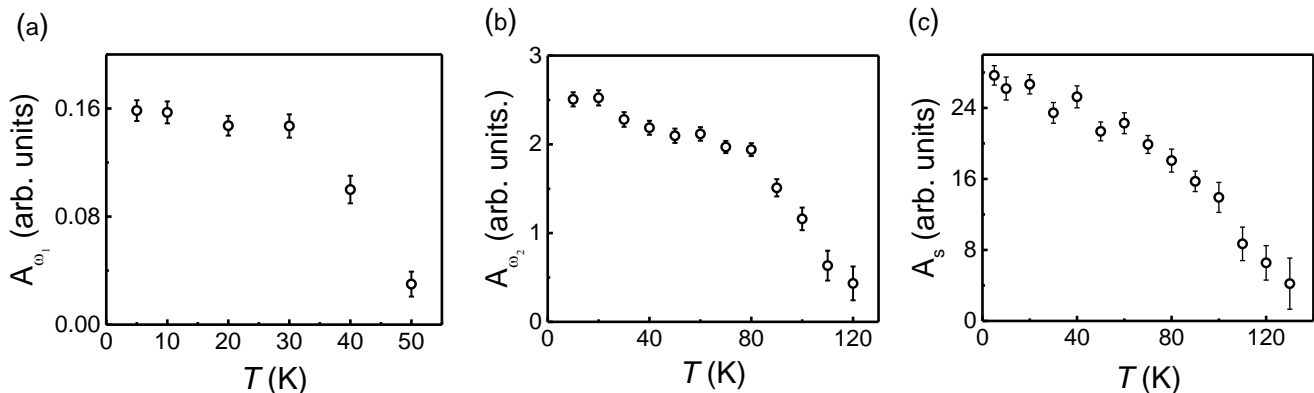

FIG. S8. (a) and (b) are fitted amplitudes for  $\omega_1$  and  $\omega_2$  modes as a function of temperature, respectively. (c) The fitted amplitude for  $\tau_s$  relaxation process as a function of temperature.

### J. Calculations of the phonon spectra and electron-phonon couplings in $\text{ZrTe}_5$

#### 1. The Phonon spectra in STI and WTI phases

We calculated the phonon spectra of  $\text{ZrTe}_5$  in the strong topological insulator (STI) phase and weak topological insulator (WTI) phase. The structure of WTI phase was obtained by the fully relaxed lattice which has larger interplane distance, whereas the structure of STI phase was taken from experiments [20, 21], which only have relaxation of the atom position but have no unit cell volume relaxation. The phonon spectrum was calculated using the Quantum Espresso package [22, 23] via the density functional perturbation theory (DFPT) method [24]. In all the calculations, we used the GGA-PBE functional and norm-conserving potential [25]. We set the plane wave energy cutoff as 90 Ry and a  $5 \times 5 \times 3k$ -mesh. The spin-orbit coupling (SOC) was also considered in the calculations. The phonon spectra of both STI and WTI phases are shown in Fig. S9. In both cases, the lowest optical mode (with  $B_{1g}$  representation which has Raman activity) at  $\Gamma$  point is near 1 THz, which can be seen in Table II and III.



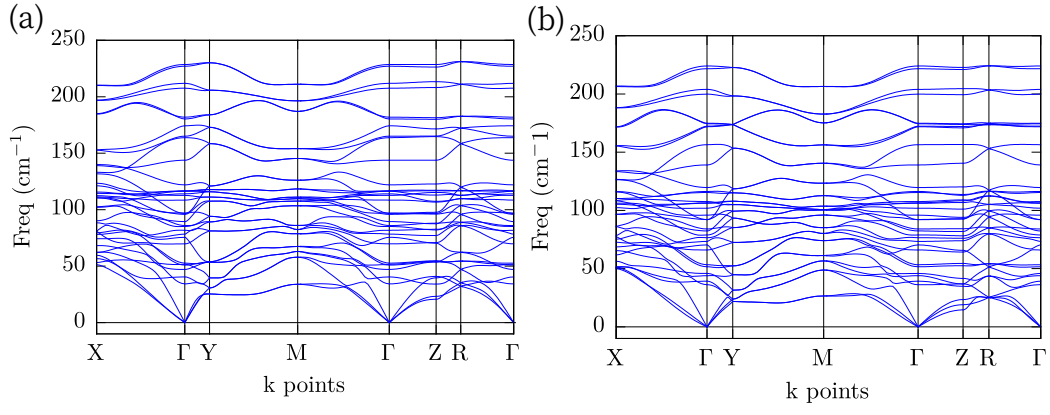

FIG. S9. The phonon spectra of (a) STI phase and (b) WTI phase. The lowest optical phonon mode ( $B_{1g}$  representation with Raman activity) at  $\Gamma$  point is near 1 THz.

TABLE II. The phonon frequency, representation, and active index (R or I) at  $\Gamma$  point for the STI phase. R and I represent the Raman and Infrared active modes, respectively. In our experiment, five Raman active modes were observed. According to Refs.[7, 8], three frequencies of  $\sim 1.2$  THz,  $\sim 3.7$  THz,  $\sim 4.6$  THz are attributed to the  $A_g$  phonon modes. The other two frequencies of  $\sim 2.2$  THz and  $\sim 2.6$  THz arise from the  $B_{2g}$  modes.

| # mode | Frequency (THz) | Representation | Active Index |
|--------|-----------------|----------------|--------------|
| 1      | -0.0000         | $B_{3u}$       | I            |
| 2      | -0.0000         | $B_{2u}$       | I            |
| 3      | 0.0000          | $B_{1u}$       | I            |
| 4      | 1.0275          | $B_{1g}$       | R            |
| 5      | 1.2118          | $B_{1u}$       | I            |
| 6      | 1.4118          | $A_g$          | R            |
| 7      | 1.5267          | $B_{2g}$       | R            |
| 8      | 1.5483          | $B_{2u}$       | I            |
| 9      | 1.5785          | $A_u$          |              |
| 10     | 2.0904          | $B_{1u}$       | I            |
| 11     | 2.2638          | $B_{3u}$       | I            |
| 12     | 2.3485          | $B_{2g}$       | R            |
| 13     | 2.4509          | $B_{3g}$       | R            |
| 14     | 2.5515          | $B_{1u}$       | I            |
| 15     | 2.5762          | $A_u$          |              |
| 16     | 2.6816          | $B_{2u}$       | I            |
| 17     | 2.8736          | $B_{1g}$       | R            |
| 18     | 2.8967          | $B_{3g}$       | R            |
| 19     | 2.9104          | $B_{2g}$       | R            |
| 20     | 3.2520          | $B_{3u}$       | I            |
| 21     | 3.3763          | $B_{1u}$       | I            |
| 22     | 3.4184          | $A_g$          | R            |
| 23     | 3.4864          | $B_{2g}$       | R            |
| 24     | 3.4914          | $A_g$          | R            |
| 25     | 3.4996          | $B_{3u}$       | I            |
| 26     | 3.6566          | $B_{1g}$       | R            |
| 27     | 4.3111          | $A_g$          | R            |
| 28     | 4.9099          | $B_{2g}$       | R            |
| 29     | 4.9485          | $A_g$          | R            |
| 30     | 5.2246          | $B_{3u}$       | I            |
| 31     | 5.4057          | $B_{1g}$       | R            |
| 32     | 5.4537          | $B_{2u}$       | I            |
| 33     | 6.2225          | $B_{2g}$       | R            |
| 34     | 6.3514          | $B_{1u}$       | I            |
| 35     | 6.8057          | $B_{3u}$       | I            |
| 36     | 6.8519          | $A_g$          | R            |

TABLE III. The phonon frequency, representation, and active index (R or I) at  $\Gamma$  point for the WTI phase. R and I represent the Raman and Infrared active modes, respectively. In our experiment, five Raman active modes were observed. According to Refs.[7, 8], three frequencies of  $\sim 1.2$  THz,  $\sim 3.7$  THz,  $\sim 4.6$  THz are attributed to the  $A_g$  phonon modes. The other two frequencies of  $\sim 2.2$  THz and  $\sim 2.6$  THz arise from the  $B_{2g}$  modes.

| # mode | Frequency (THz) | Representation | Active Index |
|--------|-----------------|----------------|--------------|
| 1      | -0.0000         | $B_{3u}$       | I            |
| 2      | -0.0000         | $B_{2u}$       | I            |
| 3      | 0.0000          | $B_{1u}$       | I            |
| 4      | 1.0842          | $B_{1g}$       | R            |
| 5      | 1.1749          | $B_{1u}$       | I            |
| 6      | 1.3171          | $A_g$          | R            |
| 7      | 1.3739          | $B_{2g}$       | R            |
| 8      | 1.5459          | $B_{2u}$       | I            |
| 9      | 1.5993          | $A_u$          |              |
| 10     | 1.9792          | $B_{1u}$       | I            |
| 11     | 2.1081          | $B_{3u}$       | I            |
| 12     | 2.1994          | $B_{2g}$       | R            |
| 13     | 2.2954          | $B_{3g}$       | R            |
| 14     | 2.3647          | $B_{1u}$       | I            |
| 15     | 2.4690          | $B_{2u}$       | I            |
| 16     | 2.5205          | $A_u$          |              |
| 17     | 2.7589          | $B_{3g}$       | R            |
| 18     | 2.7638          | $B_{1g}$       | R            |
| 19     | 2.8746          | $B_{2g}$       | R            |
| 20     | 3.0544          | $B_{3u}$       | I            |
| 21     | 3.1805          | $A_g$          | R            |
| 22     | 3.1929          | $B_{3u}$       | I            |
| 23     | 3.2260          | $B_{1u}$       | I            |
| 24     | 3.4584          | $B_{2g}$       | R            |
| 25     | 3.4855          | $A_g$          | R            |
| 26     | 3.5860          | $B_{1g}$       | R            |
| 27     | 4.1682          | $A_g$          | R            |
| 28     | 4.6901          | $B_{2g}$       | R            |
| 29     | 5.1528          | $A_g$          | R            |
| 30     | 5.1669          | $B_{1g}$       | R            |
| 31     | 5.2276          | $B_{2u}$       | I            |
| 32     | 5.2424          | $B_{3u}$       | I            |
| 33     | 5.9912          | $B_{2g}$       | R            |
| 34     | 6.1136          | $B_{1u}$       | I            |
| 35     | 6.6459          | $B_{3u}$       | I            |
| 36     | 6.7167          | $A_g$          | R            |

## 2. Calculations of the electron-phonon couplings

We also performed the calculation of the electron-phonon coupling to investigate the possible charge density wave (CDW) phase of  $\text{ZrTe}_5$  using the EPW package [26, 27]. We choose the double-delta approximation to calculate the phonon linewidth. To get a converged result with increasing the density of  $k$ -mesh, we choose a  $110 \times 110 \times 55$  fine  $k$ -mesh for STI phase and a  $150 \times 150 \times 75$   $k$ -mesh for WTI phase. Because the ordinary electronic state in DFT calculation is an insulator, we increased the Fermi level to get electron-type carriers with three kinds of carrier density as  $4.97 \times 10^{19} \text{ cm}^{-3}$ ,  $2.27 \times 10^{20} \text{ cm}^{-3}$ , and  $7.25 \times 10^{20} \text{ cm}^{-3}$ . The corresponding phonon linewidth of acoustic modes (the three lowest frequency phonon modes) are shown in Fig. S10. According to the phonon linewidth, we can

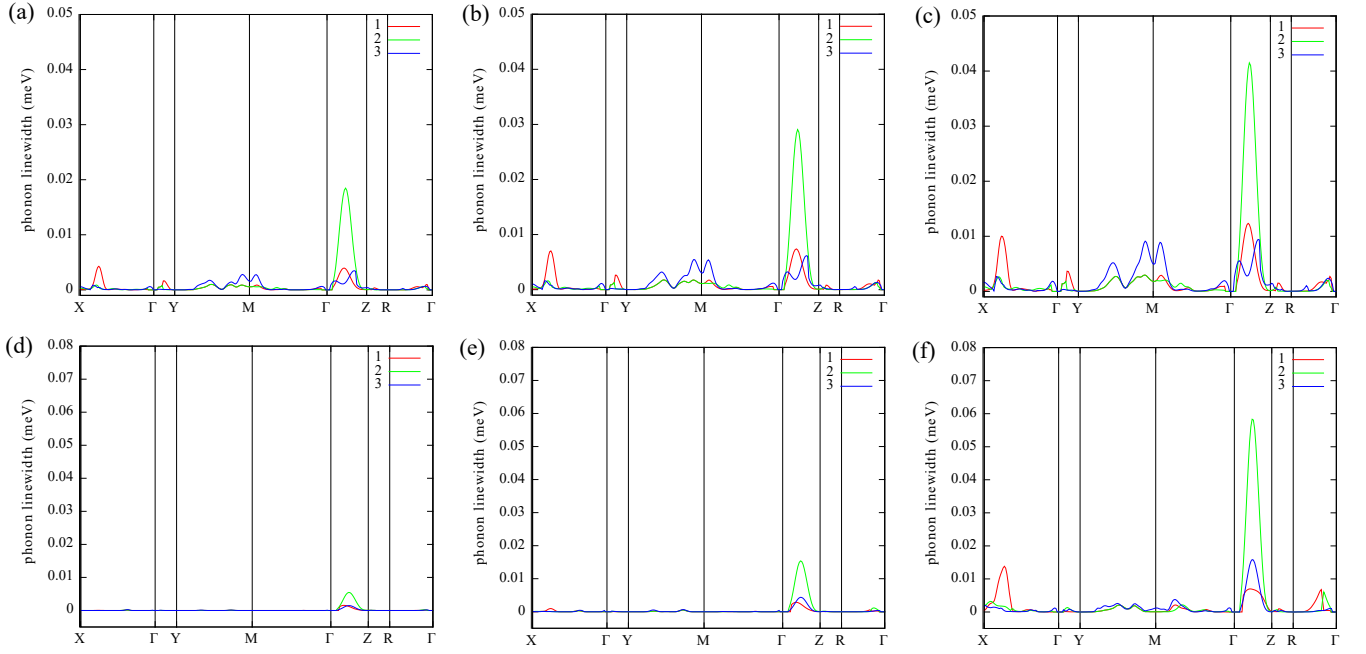

FIG. S10. The phonon linewidth of three acoustic modes (the three lowest frequency modes) corresponding to the carrier density of  $4.97 \times 10^{19} \text{ cm}^{-3}$  [ Fig. S10 (a) for STI phase, (d) for WTI phase ],  $2.27 \times 10^{20} \text{ cm}^{-3}$  [ Fig. S10 (b) for STI phase, (e) for WTI phase] and  $7.25 \times 10^{20} \text{ cm}^{-3}$  [ Fig. S10 (c) for STI phase, (f) for WTI phase]. The convention of the high-symmetry points' label is the same as [28].

conclude that for both of the STI phase and WTI phase, the electron-phonon coupling in the inter-plane direction ( $\Gamma$ -Z direction) is stronger than those in the other directions. So the CDW phase can be mostly possible along the inter-plane direction ( $b$ -axis).

- 
- [1] T. Dekorsy, G. C. Cho, and H. Kurz, in *Light Scattering in Solids VIII*, Ed. by M. Cardona and G. Güntherodt (Springer, Berlin, 2000)
- [2] Y. Jiang, Z. L. Dun, H. D. Zhou, Z. Lu, K.-W. Chen, S. Moon, T. Besara, T. M. Siegrist, R. E. Baumbach, D. Smirnov, and Z. Jiang, *Phys. Rev. B* **96**, 041101(R) (2017).
- [3] Q. Li, D. E. Kharzeev, C. Zhang, Y. Huang, I. Pletikosic, A. V. Fedorov, R. D. Zhong, J. A. Schneeloch, G. D. Gu, and T. Valla, *Nat. Phys.* **12**, 550 (2016).
- [4] P. B. Allen, *Phys. Rev. B* **6**, 2577 (1972).
- [5] R. H. Groeneveld, R. Sprik, and A. Lagendijk, *Phys. Rev. B* **51**, 11433 (1995).
- [6] A. A. Lopez, *Phys. Rev.* **175**, 823 (1968).
- [7] A. Zwick, G. Landa, R. Carles, M. A. Renucci, and A. Kjekshus, *Solid State Commun* **44**, 89 (1982).
- [8] Landa. G, Zwick. A, Carles. R, Renucci. M. A, Kjekshus. A. *Solid state commun.* **49**, 1095(1984).
- [9] R. Merlin, *Solid State Commun.* **102**, 207 (1997).
- [10] G. A. Garrett, T. F. Albrecht, J. F. Whitaker, and R. Merlin, *Phys. Rev. Lett.* **77**, 3661 (1996).
- [11] I. Gdor, T. Ghosh, O. Lioubashevski, and S. Ruhman, *J. Phys. Chem. Lett.* **8**, 1920 (2017).
- [12] G. Batignani, C. Ferrante, G. Fumero, and T. Scopigno, *J. Phys. Chem. Lett.* **10**, 7789 (2019).
- [13] J. Qi et al., *Phys. Rev. Lett.* **111**, 057402 (2013).
- [14] M. Balkanski, R. F. Wallis, and E. Haro, *Phys. Rev. B* **28**, 1928 (1983).
- [15] J. Menendez and M. Cardona, *Phys. Rev. B* **29**, 2051 (1984).
- [16] H. Tang and I. P. Herman, *Phys. Rev. B* **43**, 2299 (1991).
- [17] Z. Guo, H. Gu, M. Fang, B. Song, W. Wang, X. Chen, C. Zhang, H. Jiang, L. Wang, and S. Liu, *ACS Materials Lett.* **3**, 525 (2021).
- [18] V. L. Ginzburg, *Sov. Phys. Usp.* **5**, 649 (1963).
- [19] Y. Toda, F. Kawanokami, T. Kurosawa, M. Oda, I. Madan, T. Mertelj, V. V. Kabanov, and D. Mihailovic, *Phys. Rev. B* **90**, 094513(2014).
- [20] ZrTe<sub>5</sub> crystal structure: Datasheet from “pauling file multinaries edition – 2012” in *springer materials* ([https://materials.springer.com/isp/crystallographic/docs/sd\\_0452870](https://materials.springer.com/isp/crystallographic/docs/sd_0452870)). Copyright 2016 Springer-Verlag Berlin Heidelberg & Material Phases Data System (MPDS), Switzerland & National Institute for Materials Science (NIMS), Japan.
- [21] S. Furuseth, L. Brattas, and A. Kjekshus. *J. Acta Chemica Scandinavica* **27**, 2367 (1973).
- [22] P. Giannozzi, S. Baroni, et al., *J. Phys. Condens. Matter* **21**, 395502 (2009).
- [23] P. Giannozzi, O. Andreussi, et al., *J. Phys. Condens. Matter* **29**, 465901 (2017).
- [24] S. Baroni, S. d. Gironcoli, A. D. Corso, and P. Giannozzi, *Rev. Mod. Phys.* **73**, 515 (2001).
- [25] D. R. Hamann. *Phys. Rev. B* **88**, 085117 (2013).
- [26] F. Giustino, M. L. Cohen, and S. G. Louie. *Phys. Rev. B* **76**, 165108 (2007).
- [27] S. Poncé, E.R. Margine, C. Verdi, and F. Giustino. *Comput Phys Commun* **209**, 116 (2016).
- [28] H. Weng, X. Dai, and Z. Fang, *Phys. Rev. X* **4**, 011002 (2014).
